# Supplementary material for: Interpretable machine learning-assisted screening of perovskite oxides
Source: Royal Society of Chemistry journal article supplement (doi:10.1039/d3ra08591k), 2024-01-01
Supplement: d3ra08591k1.pdf [file d3ra08591k1.pdf]

## **Electronic Supplementary Information**

### **Interpretable Machine Learning-Assisted**

### **Screening of Perovskite Oxides**

Jie Zhao<sup>\*a</sup>, Xiaoyan Wang<sup>\*b</sup>, Haobo Li<sup>c</sup>, Xiaoyong Xu<sup>\*c</sup>

<sup>a</sup> College of Chemical Engineering, Nanjing Tech University, Nanjing, Jiangsu 211816, China

<sup>b</sup> School of Computer Science, Nanjing Audit University, Nanjing, Jiangsu 211815, China

<sup>c</sup> School of Chemical Engineering, The University of Adelaide, Adelaide, SA 5005, Australia

Corresponding Authors:

[j.zhao1@njtech.edu.cn](mailto:j.zhao1@njtech.edu.cn), [xywang@nau.edu.cn](mailto:xywang@nau.edu.cn), [xiaoyong.xu@adelaide.edu.au](mailto:xiaoyong.xu@adelaide.edu.au)

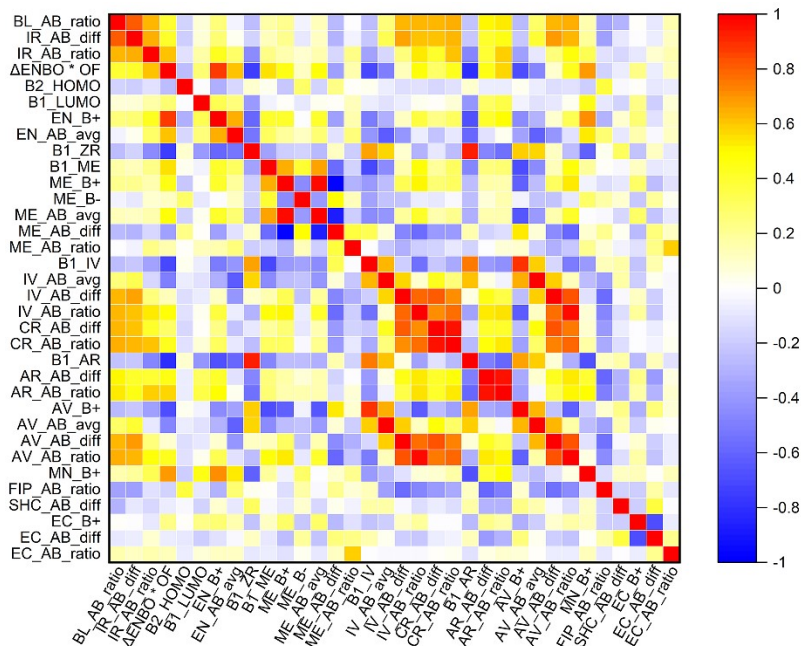

Fig. S1 Pairwise Pearson correlation coefficient heatmap of the 34 features screened from the 291 features.

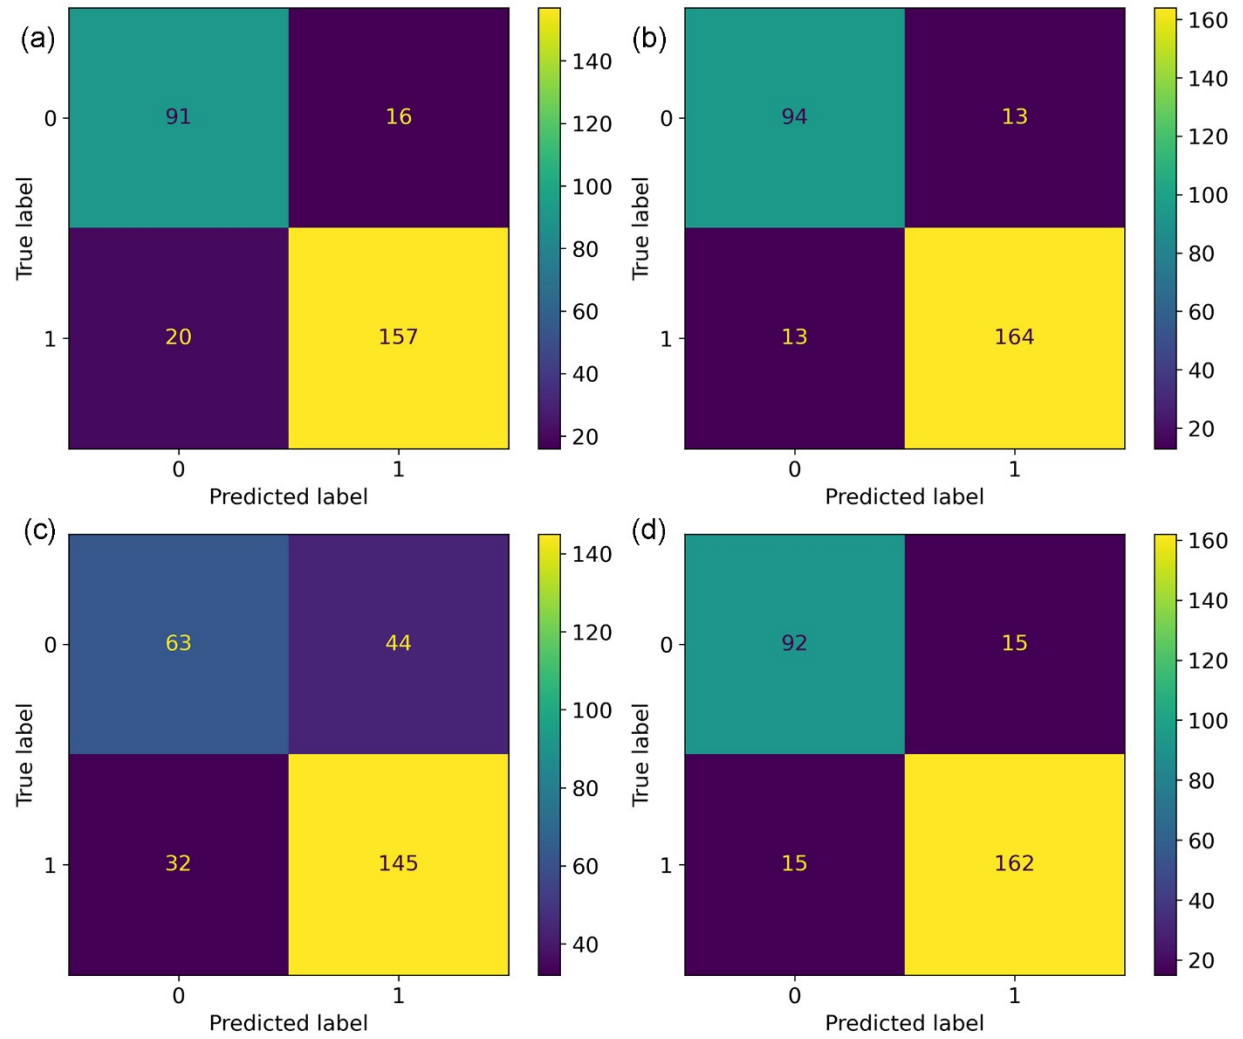

Fig. S2 Confusion matrices of the (a) ABC-23, (b) GBC-23, (c) LRC-23, and (d) RFC-23 models.

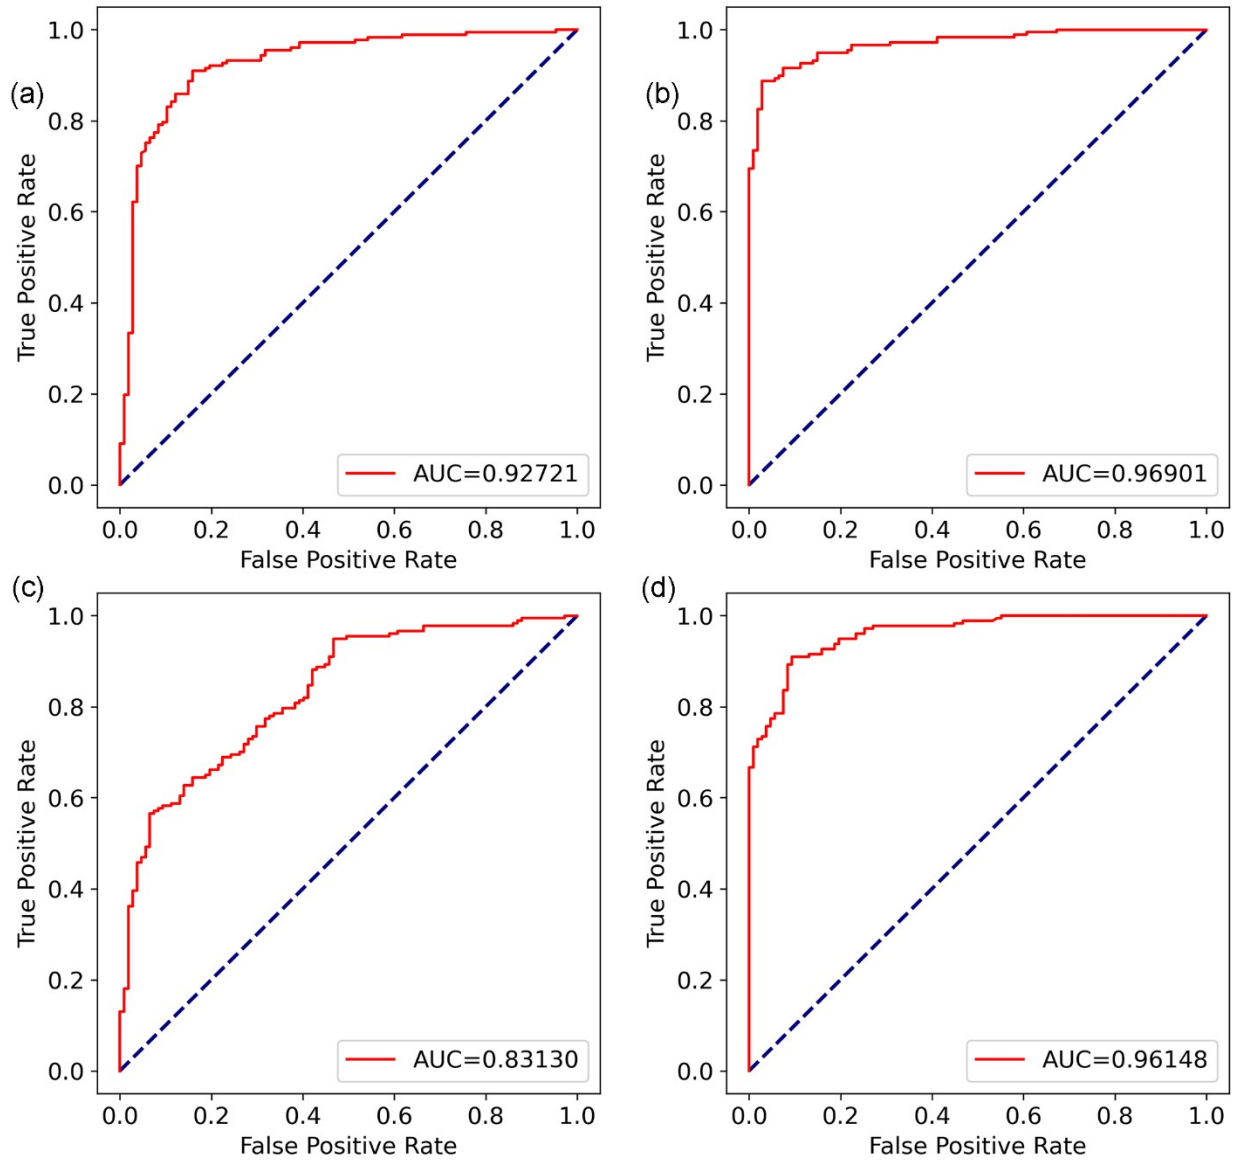

Fig. S3 ROC curves of the (a) ABC-23, (b) GBC-23, (c) LRC-23, and (d) RFC-23 models.

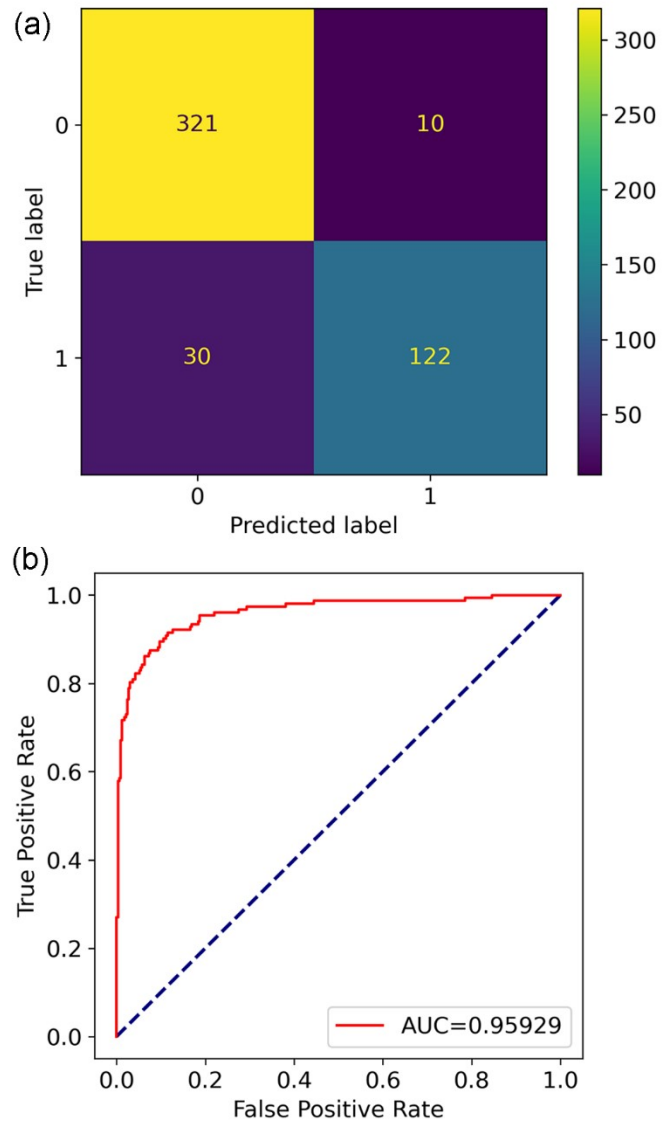

Fig. S4 The (a) confusion matrix and (b) ROC curve of the XGBC-ref model.

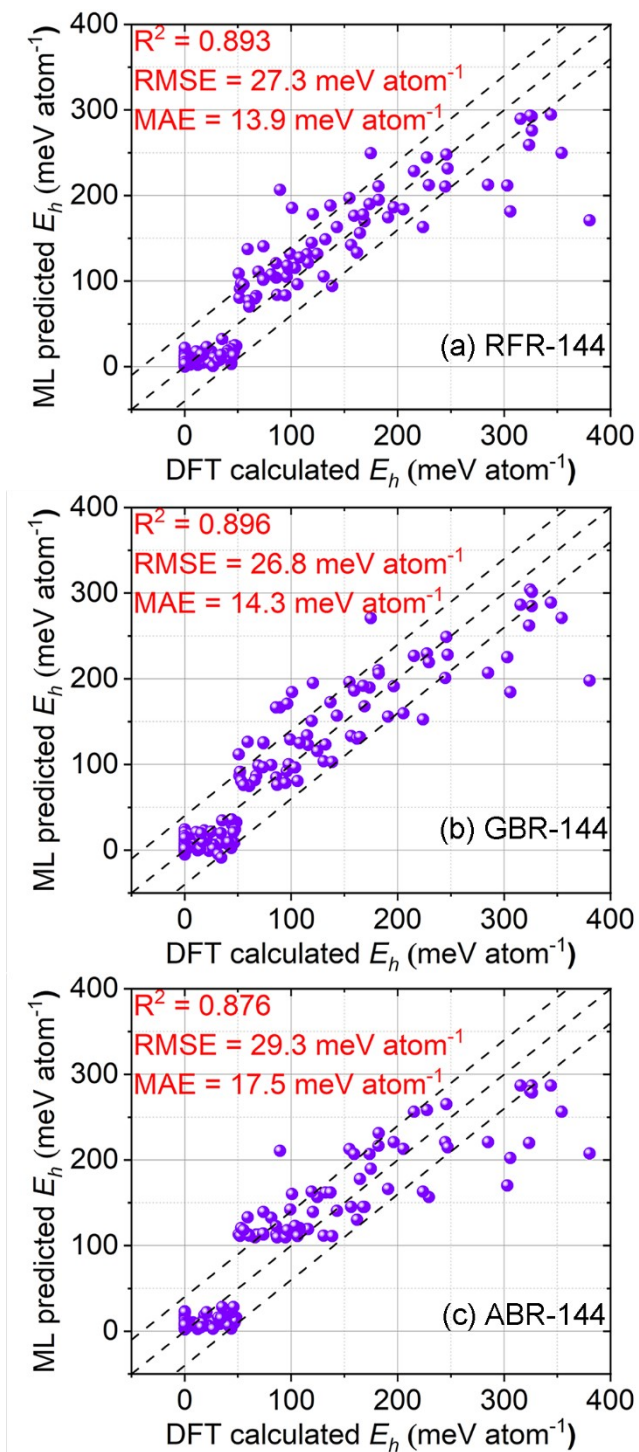

Fig. S5 Performance of the RFR-144, GBR-144, and ABR-144 regression models.

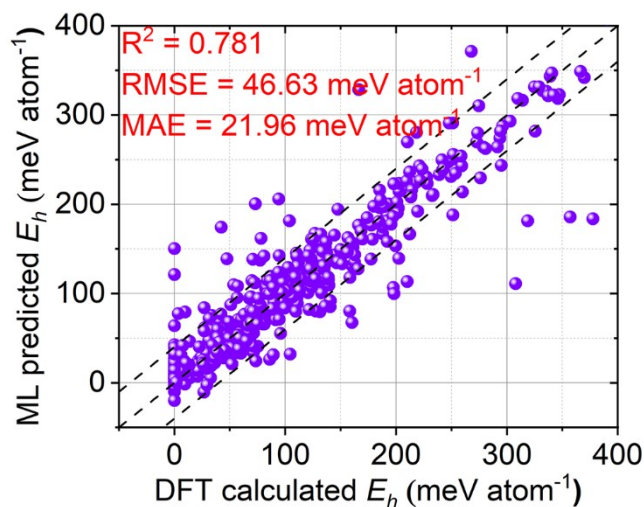

Fig. S6 Performance of the XGBR-ref model that was trained on the dataset of ref 22.

Table S1 The 23 optimal features and the 11 removed features during feature selection for classification model training.

|                            |                                                                                                                                                                                                                                                                                               |
|----------------------------|-----------------------------------------------------------------------------------------------------------------------------------------------------------------------------------------------------------------------------------------------------------------------------------------------|
| <b>23 optimal features</b> | <i>BL_AB_ratio, IR_AB_ratio, B2_HOMO, B1_LUMO, EN_B+,</i><br><i>EN_AB_avg, B1_ZR, B1_ME, ME_B-, ME_AB_avg,</i><br><i>ME_AB_ratio, IV_AB_avg, IV_AB_diff, IV_AB_ratio,</i><br><i>CR_AB_diff, AR_AB_diff, AV_B+, MN_B+, FIP_AB_ratio,</i><br><i>SHC_AB_diff, EC_B+, EC_AB_diff, EC_AB_ratio</i> |
| <b>11 removed features</b> | <i>IR_AB_diff, ΔEN<sub>BO</sub>*OF, ME_B+, ME_AB_diff, B1_IV,</i><br><i>CR_AB_ratio, B1_AR, AR_AB_ratio, AV_AB_avg, AV_AB_diff,</i><br><i>AV_AB_ratio</i>                                                                                                                                     |

Table S2 Hyperparameters for various machine learning models.

| Model   | Hyperparameter                               | Model    | Hyperparameter                              |
|---------|----------------------------------------------|----------|---------------------------------------------|
| ABC-23  | 'learning_rate': 0.5,<br>'n_estimators': 250 | ABR-144  | 'learning_rate': 0.2<br>'n_estimators': 100 |
| GBC-23  | 'max_depth': 6,<br>'n_estimators': 250       | GBR-144  | 'max_depth': 5<br>'n_estimators': 150       |
| LRC-23  | 'C': 100,<br>'penalty': 'l2'                 | RFR-144  | 'max_depth': 13<br>'n_estimators': 200      |
| RFC-23  | 'max_depth': 13,<br>'n_estimators': 100      | XGBR-144 | 'max_depth': 6<br>'n_estimators': 100       |
| XGBC-23 | 'max_depth': 13,<br>'n_estimators': 100      |          |                                             |



Table S3 Comparison of the  $E_h$  values predicted by the XGBR-144 model and calculated by density functional theory that are not included in the input dataset.

| <b>Formula</b>                                   | <b><math>E_h</math>-DFT</b>    | <b><math>E_h</math>-predicted</b> | <b>Formula</b>                                   | <b><math>E_h</math>-DFT</b>    | <b><math>E_h</math>-predicted</b> |
|--------------------------------------------------|--------------------------------|-----------------------------------|--------------------------------------------------|--------------------------------|-----------------------------------|
|                                                  | <b>(meV atom<sup>-1</sup>)</b> | <b>(meV atom<sup>-1</sup>)</b>    |                                                  | <b>(meV atom<sup>-1</sup>)</b> | <b>(meV atom<sup>-1</sup>)</b>    |
| Ba <sub>2</sub> CaOsO <sub>6</sub> <sup>1</sup>  | 0                              | 9                                 | BaPdO <sub>3</sub>                               | 29                             | 1                                 |
| Ba <sub>2</sub> CeZrO <sub>6</sub> <sup>2</sup>  | 24                             | 19                                | CaFeO <sub>3</sub> <sup>3</sup>                  | 52                             | 0                                 |
| Ba <sub>2</sub> CePtO <sub>6</sub>               | 0                              | 0                                 | EuHfO <sub>3</sub> <sup>4</sup>                  | 0                              | 6                                 |
| Ba <sub>2</sub> CeHfO <sub>6</sub>               | 23                             | 18                                | EuNbO <sub>3</sub> <sup>5</sup>                  | 24                             | 6                                 |
| Ba <sub>2</sub> DyNbO <sub>6</sub>               | 0                              | 2                                 | EuVO <sub>3</sub> <sup>6</sup>                   | 43                             | 0                                 |
| Ba <sub>2</sub> ErNbO <sub>6</sub> <sup>7</sup>  | 0                              | 8                                 | PrCuO <sub>3</sub> <sup>8,9</sup>                | 25                             | 7                                 |
| Ba <sub>2</sub> EuReO <sub>6</sub> <sup>10</sup> | 0                              | 5                                 | SrFeO <sub>3</sub> <sup>11</sup>                 | 0                              | 0                                 |
| Ba <sub>2</sub> HoMoO <sub>6</sub>               | 0                              | 0                                 | YbTaO <sub>3</sub> <sup>12</sup>                 | 26                             | 0                                 |
| Ba <sub>2</sub> HoNbO <sub>6</sub> <sup>13</sup> | 0                              | 0                                 | BaTaO <sub>3</sub> <sup>14</sup>                 | 32                             | 6                                 |
| Ba <sub>2</sub> LuMoO <sub>6</sub> <sup>15</sup> | 0                              | 7                                 | KReO <sub>3</sub> <sup>16</sup>                  | 37                             | 14                                |
| Ba <sub>2</sub> LuNbO <sub>6</sub> <sup>17</sup> | 0                              | 0                                 | NaReO <sub>3</sub> <sup>16</sup>                 | 42                             | 11                                |
| Ba <sub>2</sub> LuRuO <sub>6</sub> <sup>18</sup> | 0                              | 18                                | SrNiO <sub>3</sub> <sup>19</sup>                 | 46                             | 0                                 |
| Ba <sub>2</sub> LuSbO <sub>6</sub> <sup>20</sup> | 0                              | 1                                 | Ba <sub>2</sub> BiLaO <sub>6</sub> <sup>21</sup> | 28                             | 30                                |
| Ba <sub>2</sub> LuTaO <sub>6</sub> <sup>22</sup> | 0                              | 0                                 | Ba <sub>2</sub> BiDyO <sub>6</sub> <sup>21</sup> | 3                              | 36                                |
| Ba <sub>2</sub> NbVO <sub>6</sub> <sup>23</sup>  | 0                              | 5                                 | Ba <sub>2</sub> BiCeO <sub>6</sub> <sup>21</sup> | 48                             | 38                                |
| Ba <sub>2</sub> NbFeO <sub>6</sub>               | 0                              | 0                                 | Ba <sub>2</sub> BiSmO <sub>6</sub> <sup>21</sup> | 8                              | 35                                |
| Ba <sub>2</sub> NbInO <sub>6</sub>               | 0                              | 3                                 | Ba <sub>2</sub> BiGdO <sub>6</sub> <sup>21</sup> | 6                              | 26                                |
| Ba <sub>2</sub> SmMnO <sub>6</sub>               | 45                             | 26                                | Ba <sub>2</sub> BiTbO <sub>6</sub>               | 11                             | 37                                |
| Ba <sub>2</sub> TaTiO <sub>6</sub>               | 0                              | 22                                | Ba <sub>2</sub> BiLuO <sub>6</sub>               | 2                              | 32                                |

|                                                  |    |    |                                    |    |    |
|--------------------------------------------------|----|----|------------------------------------|----|----|
| Ba <sub>2</sub> TmNbO <sub>6</sub>               | 0  | 25 | Ba <sub>2</sub> BiYO <sub>6</sub>  | 3  | 36 |
| Ba <sub>2</sub> TmRuO <sub>6</sub>               | 0  | 33 | Eu <sub>2</sub> CrSbO <sub>6</sub> | 39 | 7  |
| Ba <sub>2</sub> TmMoO <sub>6</sub>               | 0  | 30 | Eu <sub>2</sub> CrSnO <sub>6</sub> | 47 | 12 |
| Ba <sub>2</sub> ZrSnO <sub>6</sub>               | 0  | 20 | Eu <sub>2</sub> FeWO <sub>6</sub>  | 29 | 3  |
| Ba <sub>2</sub> ZrTiO <sub>6</sub>               | 5  | 19 | Eu <sub>2</sub> HfTiO <sub>6</sub> | 17 | 6  |
| Ba <sub>2</sub> LaFeO <sub>6</sub>               | 42 | 0  | Eu <sub>2</sub> HfSnO <sub>6</sub> | 22 | 5  |
| BaSrMo <sub>2</sub> O <sub>6</sub>               | 47 | 1  | Eu <sub>2</sub> HfFeO <sub>6</sub> | 44 | 17 |
| BaSrCoWO <sub>6</sub> <sup>24</sup>              | 15 | 0  | Eu <sub>2</sub> LuTaO <sub>6</sub> | 22 | 6  |
| Sr <sub>2</sub> HfSnO <sub>6</sub>               | 19 | 18 | Eu <sub>2</sub> MgWO <sub>6</sub>  | 0  | 6  |
| Sr <sub>2</sub> HfTiO <sub>6</sub>               | 22 | 12 | Eu <sub>2</sub> MnWO <sub>6</sub>  | 0  | 0  |
| Sr <sub>2</sub> HfFeO <sub>6</sub>               | 42 | 5  | Eu <sub>2</sub> NbFeO <sub>6</sub> | 37 | 1  |
| Sr <sub>2</sub> HfCrO <sub>6</sub>               | 33 | 6  | Eu <sub>2</sub> NiWO <sub>6</sub>  | 34 | 3  |
| Sr <sub>2</sub> HfZrO <sub>6</sub>               | 44 | 15 | Eu <sub>2</sub> TaAlO <sub>6</sub> | 0  | 10 |
| Sr <sub>2</sub> NiRuO <sub>6</sub> <sup>25</sup> | 0  | 2  | Eu <sub>2</sub> TiNbO <sub>6</sub> | 8  | 6  |
| Sr <sub>2</sub> VWO <sub>6</sub> <sup>26</sup>   | 13 | 0  | Eu <sub>2</sub> TmTaO <sub>6</sub> | 36 | 17 |
| Sr <sub>2</sub> FeCoO <sub>6</sub> <sup>27</sup> | 20 | 0  | Eu <sub>2</sub> VWO <sub>6</sub>   | 33 | 0  |
| Sr <sub>2</sub> FeHfO <sub>6</sub> <sup>28</sup> | 42 | 5  | Eu <sub>2</sub> ZnWO <sub>6</sub>  | 0  | 4  |

---

## References

1. C. Thompson, J. Carlo, R. Flacau, T. Aharen, I. Leahy, J. Pollichemi, T. Munsie, T. Medina, G. Luke and J. Munevar, *J. Phys.: Condens. Matter*, 2014, **26**, 306003.
2. Y. S. Reddy, Y. Markandeya, B. A. Rao and G. Bhikshamaiah, *J. Mater. Sci.: Mater. Electron.*, 2018, **29**, 2966-2973.
3. P. Woodward, D. Cox, E. Moshopoulou, A. Sleight and S. Morimoto, *Phys. Rev. B*, 2000, **62**, 844.
4. H. Akamatsu, K. Fujita, H. Hayashi, T. Kawamoto, Y. Kumagai, Y. Zong, K. Iwata, F. Oba, I. Tanaka and K. Tanaka, *Inorg. Chem.*, 2012, **51**, 4560-4567.
5. Y. Kususe, S. Yoshida, K. Fujita, H. Akamatsu, M. Fukuzumi, S. Murai and K. Tanaka, *J. Solid State Chem.*, 2016, **239**, 192-199.
6. M. H. Sage, G. R. Blake, C. Marquina and T. T. M. Palstra, *Phys. Rev. B*, 2007, **76**, 195102.
7. R. Mukherjee, B. Ghosh, S. Saha, C. Bharti and T. Sinha, *J. Rare Earths*, 2014, **32**, 334-342.
8. M. Ito, H. Takahashi, H. Sakai, H. Sagayama, Y. Yamasaki, Y. Yokoyama, H. Setoyama, H. Wadati, K. Takahashi, Y. Kusano and S. Ishiwata, *Chem. Commun.*, 2019, **55**, 8931-8934.
9. B. Sateesh and N. J. English, *Chem. Phys. Lett.*, 2020, **743**, 137166.
10. Y. Sasaki, Y. Doi and Y. Hinatsu, *J. Mater. Chem.*, 2002, **12**, 2361-2366.
11. G. Xiao, Q. Liu, S. Wang, V. G. Komvokis, M. D. Amiridis, A. Heyden, S. Ma and F. Chen, *J. Power Sources*, 2012, **202**, 63-69.
12. X. Z. Wang, Z. X. Liu, H. J. Gao, Y. Jing, C. L. Li and J. Liu, *Appl. Mech. Mater.*, 2013, **423-426**, 426-429.
13. S. Nair, P. Warriar and J. Koshy, *J. Mater. Sci.*, 2003, **38**, 481-483.

14. Z. Ali, I. Khan, I. Ahmad, M. S. Khan and S. J. Asadabadi, *Mater. Chem. Phys.*, 2015, **162**, 308-315.
15. F. C. Coomer and E. J. Cussen, *J. Phys.: Condens. Matter*, 2013, **25**, 082202.
16. D. Behera, A. Dixit, K. Kumari, A. Srivastava, R. Sharma, S. K. Mukherjee, R. Khenata, A. Boumaza and S. Bin-Omran, *Eur. Phys. J. Plus*, 2022, **137**, 1345.
17. Z. Cui, T. Wang, L. Guo, F. Zhao, J. Qiu, X. Xu and X. Yu, *J. Mater. Chem. C*, 2022, **10**, 6481-6487.
18. P. Battle and C. Jones, *J. Solid State Chem.*, 1989, **78**, 108-116.
19. M. M. Hasan, A. Kabir and M. Kamruzzaman, *Results Phys.*, 2022, **41**, 105920.
20. S. A. Mir, S. Yousuf, T. M. Bhat, S. Singh, A. Q. Seh, S. A. Khandy, S. A. Sofi, Z. Saleem and D. C. Gupta, *AIP Conf. Proc.*, 2019, **2115**, 030337.
21. M. Irshad, Q. tul Ain, M. Zaman, M. Z. Aslam, N. Kousar, M. Asim, M. Rafique, K. Siraj, A. N. Tabish and M. Usman, *RSC Adv.*, 2022, **12**, 7009-7039.
22. S. Berri, N. Bouarissa, M. Ibrir and O. Meglali, *Optik*, 2021, **229**, 166272.
23. J.-C. Bernier, C. Chauvel and O. Kahn, *J. Solid State Chem.*, 1974, **11**, 265-271.
24. J. F. Shin, W. Xu, M. Zanella, K. Dawson, S. N. Savvin, J. B. Claridge and M. J. Rosseinsky, *Nat. Energy*, 2017, **2**, 16214.
25. S. E. A. Yousif and O. Yassin, *J. Alloys Compd.*, 2010, **506**, 456-460.
26. A. J. Weisenstein, *Investigation of multivalent double perovskites as electrodes for high temperature energy conversion*, Montana State University, 2012.
27. R. Pradheesh, H. S. Nair, V. Sankaranarayanan and K. Sethupathi, *Appl. Phys. Lett.*, 2012, **101**, 142401.

28. B. Merabet, O. M. Ozkendir, A. S. Hassanien and M. A. Maleque, *J. Magn. Magn. Mater.*,  
2021, **518**, 167374.
